# Supplementary material for: Molecular recognition of RhlB and RNase D in the Caulobacter crescentus RNA degradosome
Source: PubMed Central journal article supplement (PMC4245959; doi:10.1093/nar/gku1134), 2014-11-11

**Figure S1. Conservation and secondary structure prediction of the S1 and 5'-sensor domains of RNase E**

**(A) Multiple sequence alignment of the S1 and 5'-sensor domains of RNase E from divergent organisms.** Representative  $\alpha$ -proteobacteria (*Caulobacter crescentus*, *Brucella melitensis*, *Rhodobacter sphaeroides*),  $\gamma$ -proteobacteria (*Escherichia coli*, *Shigella flexneri*, *Erwinia tasmaniensis*),  $\beta$ -proteobacteria (*Vibrio cholerae*, *Pseudomonas aeruginosa*, *Burkholderia cepacia*) and plant (*Arabidopsis thaliana*, *Ricinus communis*, *Oryza sativa subsp. japonica*) species are shown. The S1 domains, S1 inserts (where present) and 5' phosphate sensor domains are indicated above the sequences.

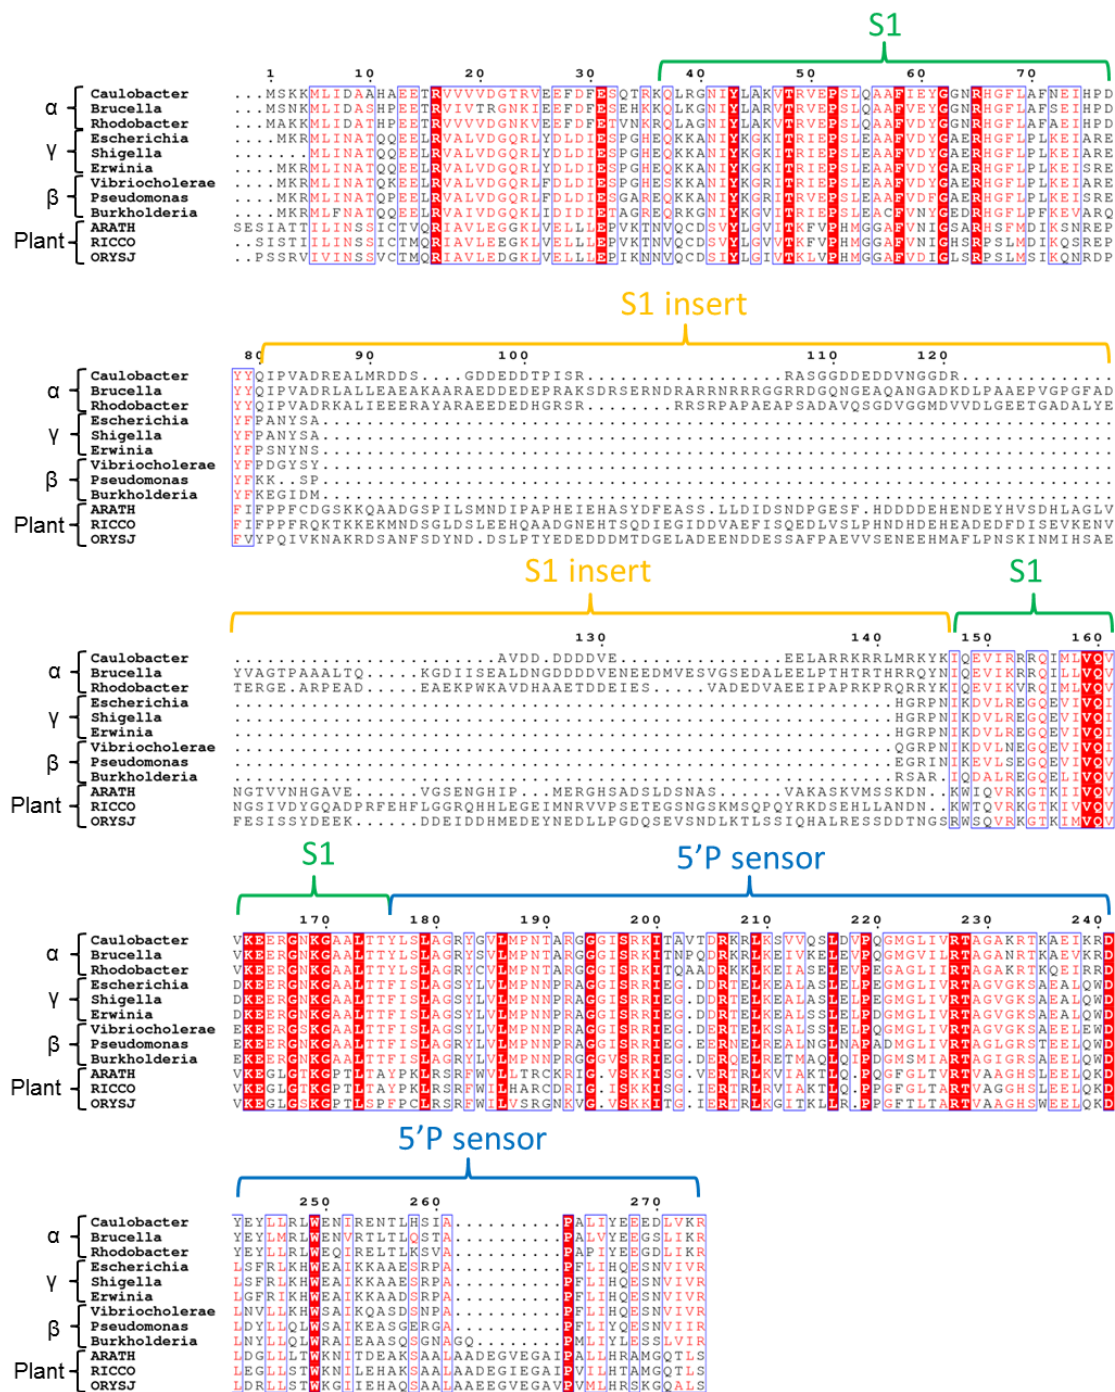

**(B) PONDR prediction of structural disorder in the S1 and 5'-sensor domains.** PONDR predicts intrinsically disordered regions of proteins based on amino acid sequence. Blue line indicates the PONDR prediction for the sequence of the S1 and 5'-sensor domains present in the CcNTD<sub>1-274</sub> crystal structure.

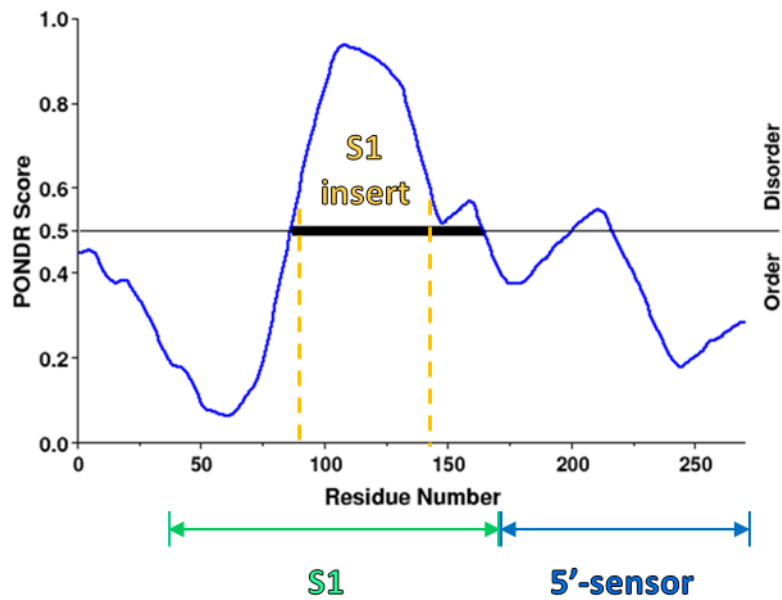

**Figure S2. Co-immuno purification of *C. crescentus* RNase E and negative control. (Left lane)** A representative pulldown of RNase E via an anti-RNase E antibody, showing the co-purification of the degradosome proteins Aconitase, PNPase, RhlB and RNase D. **(Right lane)** Negative control experiment, performed in the absence of anti-RNase E antibody. Significant non-specific enrichment of EftU is seen as a band running at an equivalent position to RNase D.

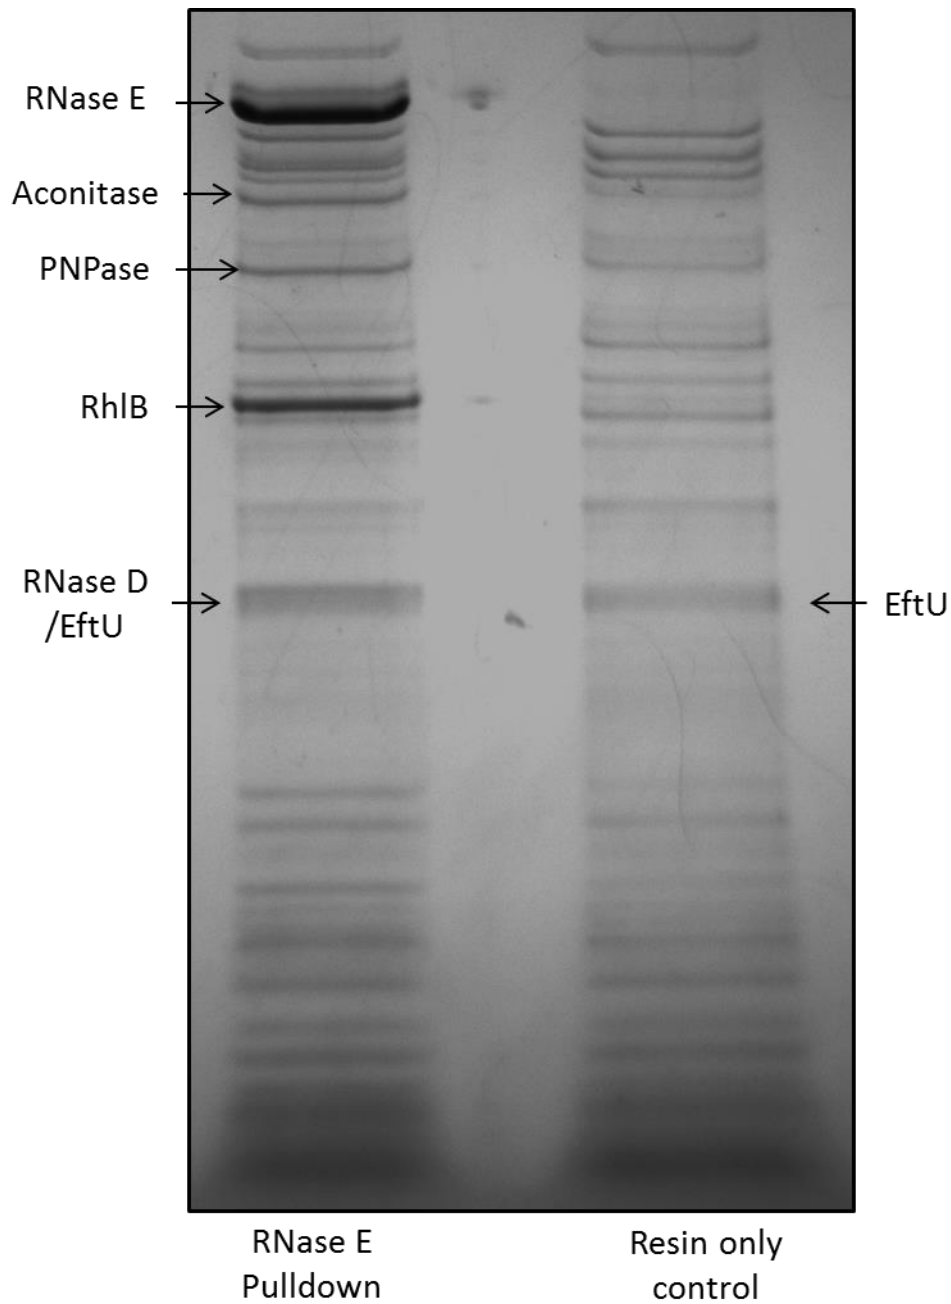

**Figure S3. Pulldown of the *C. crescentus* RNA degradosome via RNase D (expanded version of Figure 1D).** N-terminally His-tagged RNase D bait protein is shown as input lane. Known degradosome proteins (RNase E, Aconitase, PNPase and RhlB) are identified in the pulldown lane. A negative control is shown of the pulldown experiment in the absence of input RNase D, to highlight that multiple *C. crescentus* proteins bind non-specifically to the Nickel affinity resin at low levels. Particularly, a band running at the approximate position of RhlB in the negative control experiment was identified as the molecular chaperone GroEL by mass spectrometry, whereas the band at the equivalent position in the pulldown lane was identified as a mixture of RhlB and GroEL.

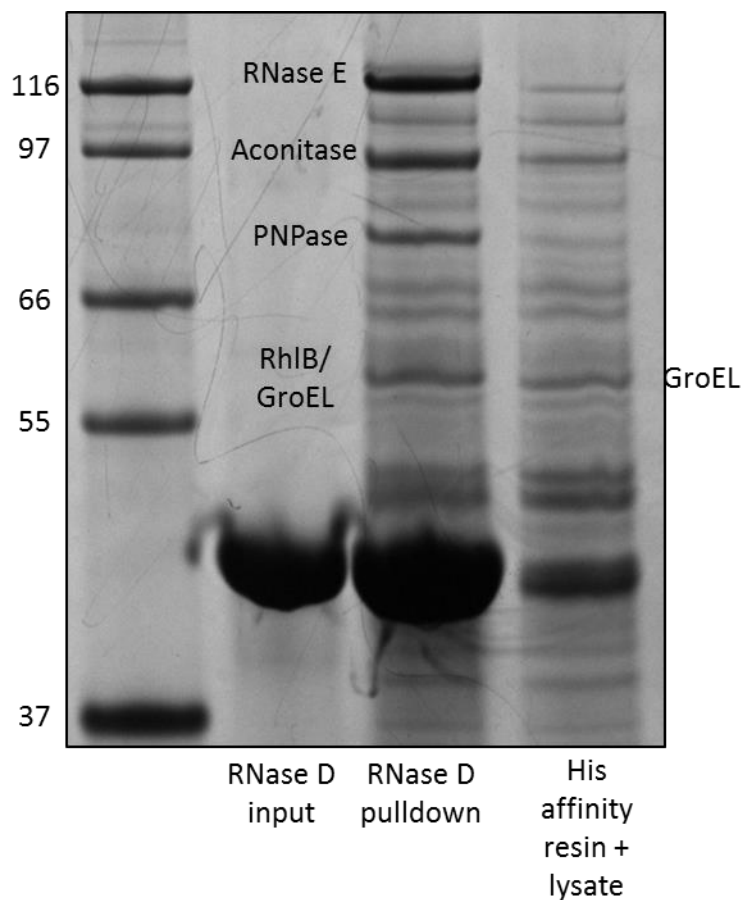

**Figure S4. Sedimentation velocity analytical ultracentrifugation of *C. crescentus* RNase D.** RNase D forms a dimer in solution. (A) UV280 Absorbance scans taken at 50,000 rpm. (B) Residuals from fitting the absorbance data to a continuous molecular mass distribution. (C) Continuous molecular mass distribution [c(M)] was fitted using SEDFIT. The peak value corresponds to an approximate mass of 88,900 Da (theoretical mass of RNase D dimer with N-terminal His-tag = 89,300 Da).

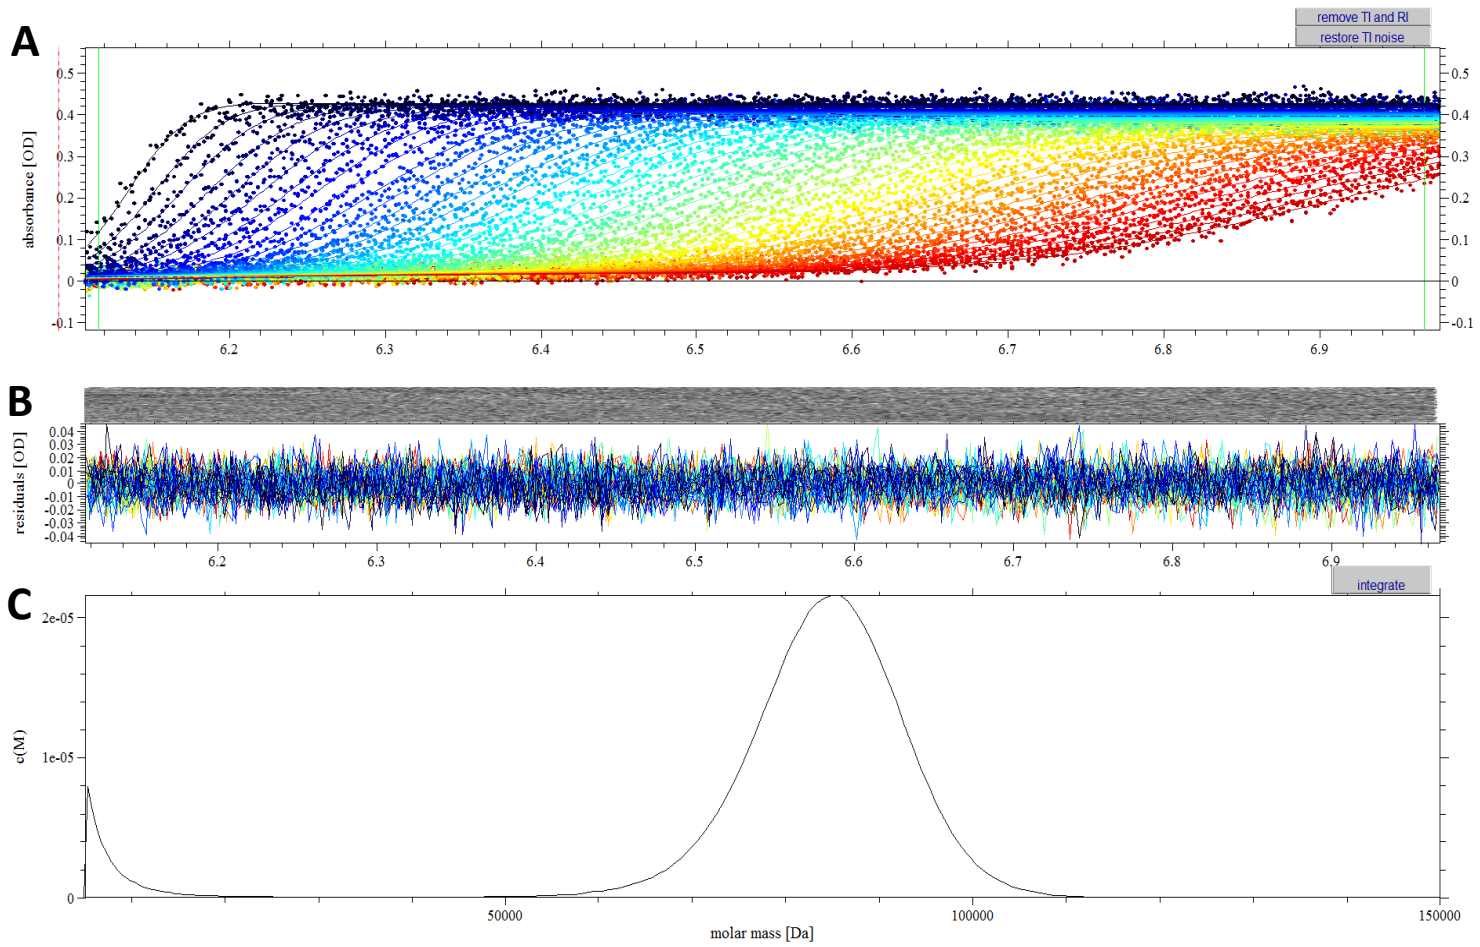

**Figure S5. Sedimentation velocity analytical ultracentrifugation of the CcNTD – RhIB complex .**

CcNTD forms a 1:2 complex with RhIB (tetramer CcNTD:monomer RhIB) in solution. (A) UV280 Absorbance scans taken at 40,000 rpm for the complex (2 mg/mL). (B) Residuals from fitting the absorbance data to a continuous molecular mass distribution. (C) Continuous molecular mass distribution [c(M)] was fitted using SEDFIT. The peak value corresponds to an approximate mass of 380,000 Da (theoretical mass of 1:2 complex = 370,000 Da).

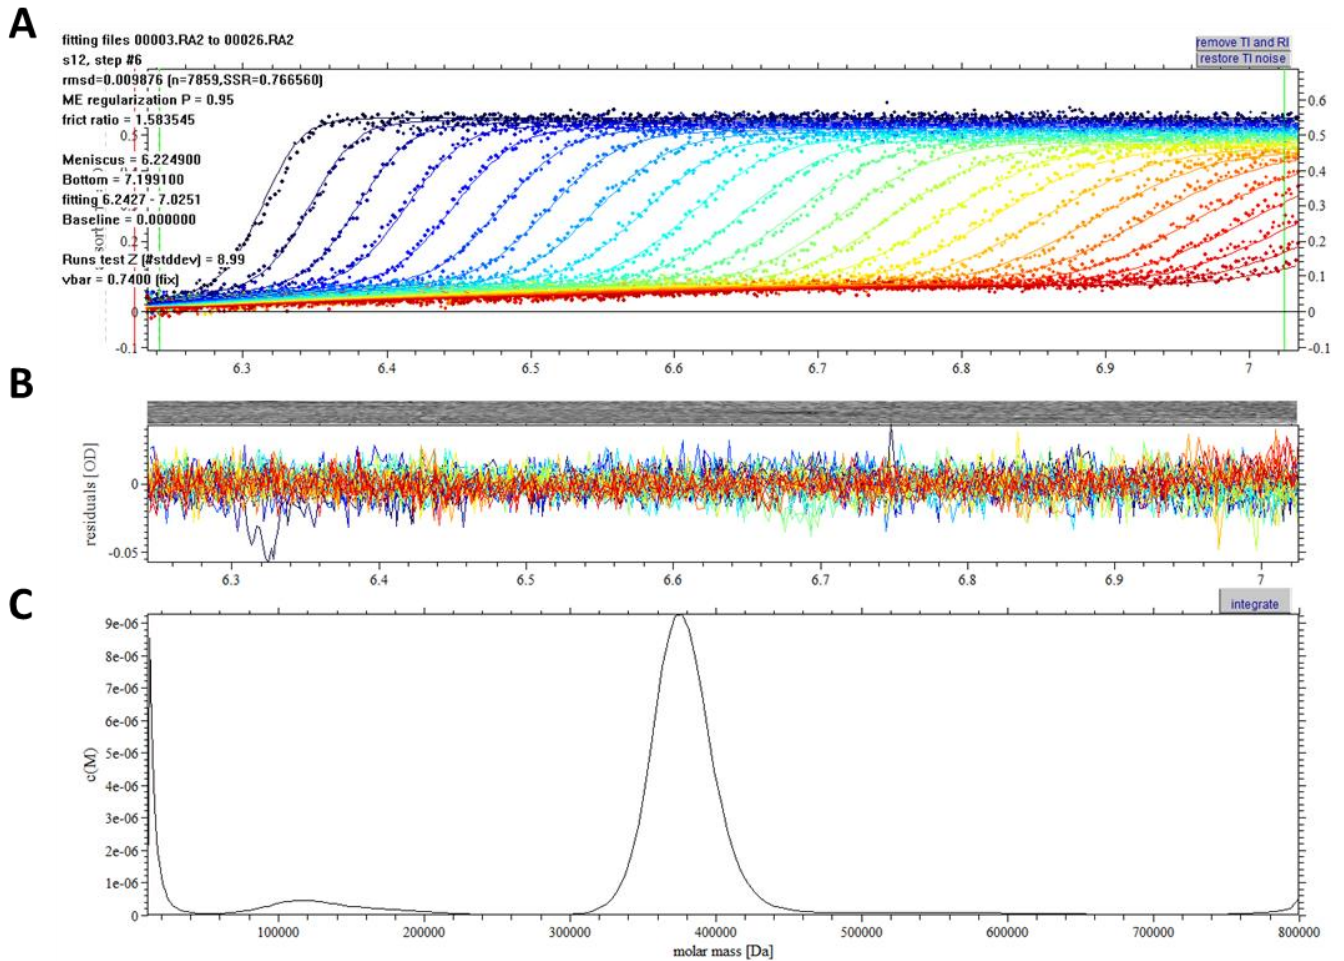

**Figure S6. Sedimentation velocity analytical ultracentrifugation of CcNTD.** CcNTD forms a tetramer in solution. (A) Interference scans taken at 40,000 rpm for CcNTD (2 mg/mL). (B) Residuals from fitting the interference data to a continuous molecular mass distribution. (C) Continuous molecular mass distribution [c(M)] was fitted using SEDFIT. The peak value corresponds to an approximate mass of 265,000 Da (theoretical mass of tetramer = 260,000 Da).

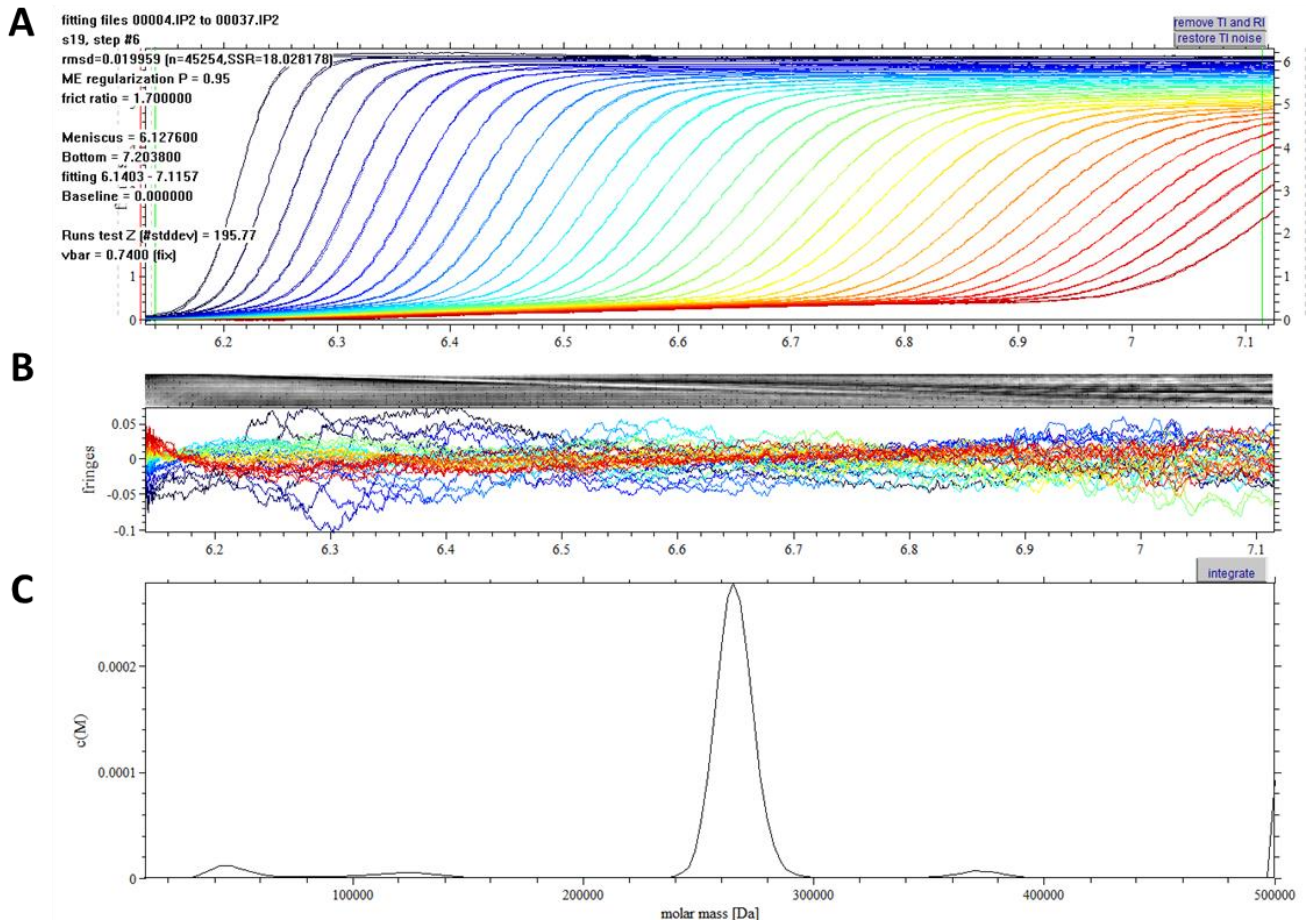

**Figure S7.** Sedimentation velocity analytical ultracentrifugation of CcRhIB. CcRhIB forms a monomer in solution. (A) Interference scans taken at 40,000 rpm for CcRhIB (2 mg/mL). (B) Residuals from fitting the interference data to a continuous molecular mass distribution. (C) Continuous molecular mass distribution  $[c(M)]$  was fitted using SEDFIT. The peak value corresponds to an approximate mass of 56,900 Da (theoretical mass of monomer = 56,700 Da).

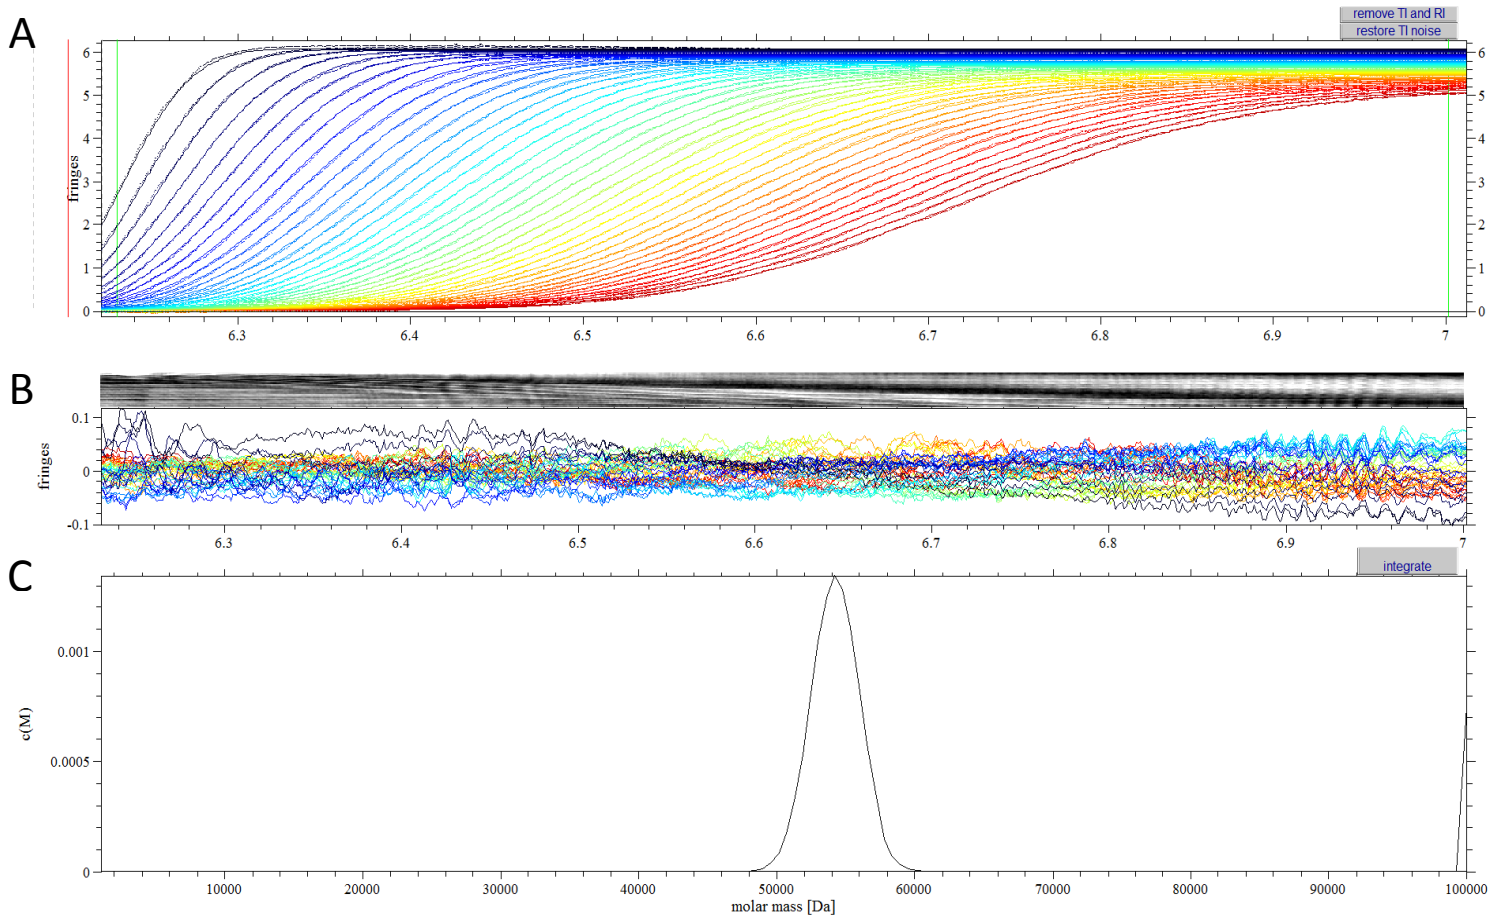



**Figure S8 Sedimentation velocity analytical ultracentrifugation of CcNTD1-274 – RhlB complex**  
CcNTD1-274 forms a 1:1 complex with RhlB in solution. (A) Interference scans taken at 50,000 rpm for CcNTD1-274 – RhlB (2 mg/mL). (B) Residuals from fitting the interference data to a continuous molecular mass distribution. (C) Continuous molecular mass distribution  $[c(M)]$ , which was fitted using SEDFIT. The peak value corresponds to an approximate mass of 93,000 Da (theoretical mass of a 1:1 complex = 88,000 Da).

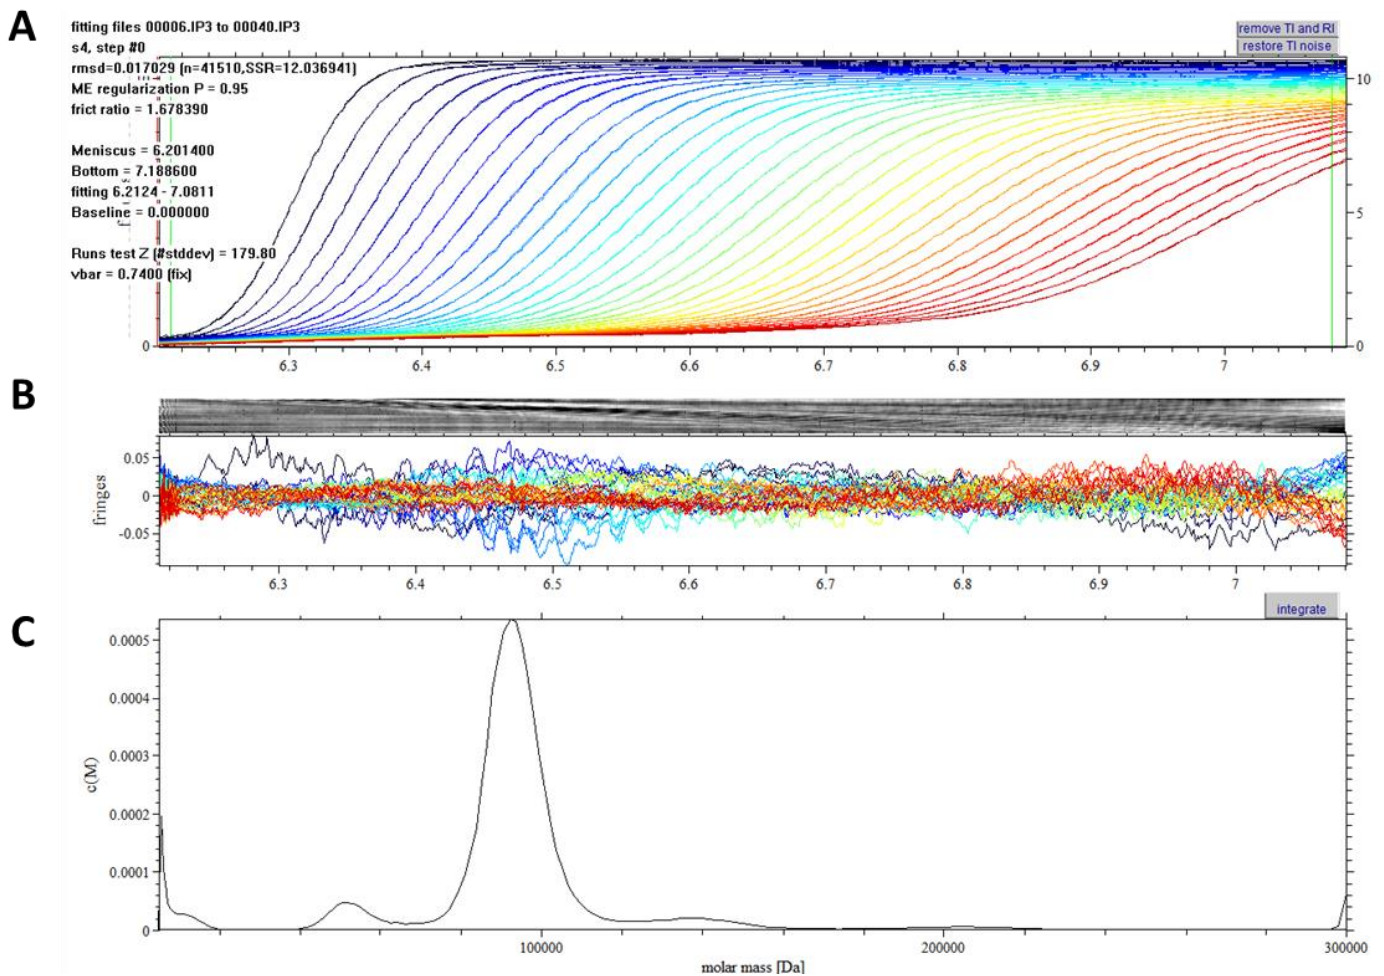

**Figure S9. ANCHOR prediction of RhIB.** Red line indicates probability of structural disorder according to the IUPred algorithm. Blue line is the ANCHOR score for predicted protein – protein interaction sites.

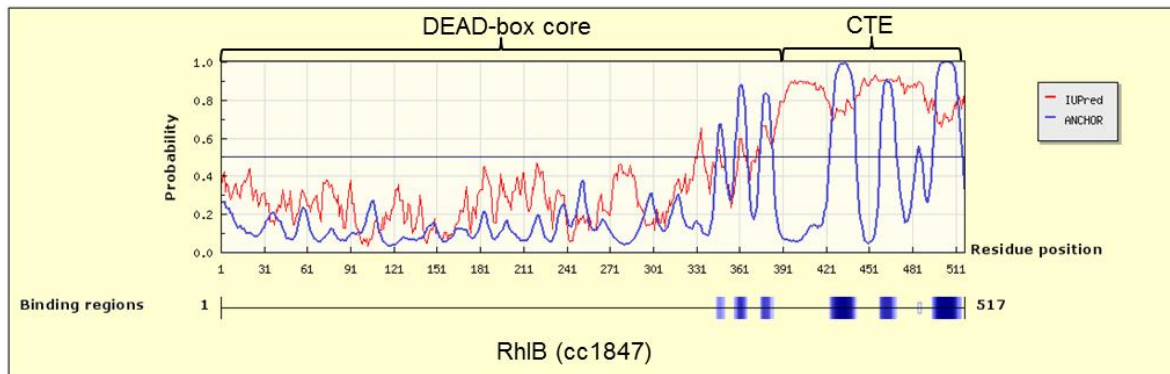

**Figure S10. Sequence alignment of Rh1B.** Sequences from *E. coli* and *C. crescentus* are aligned with two homologs, Vasa from *Drosophila* and Mss116p from yeast, whose crystal structures are known. The helicase core domain and C-terminal extension are indicated.

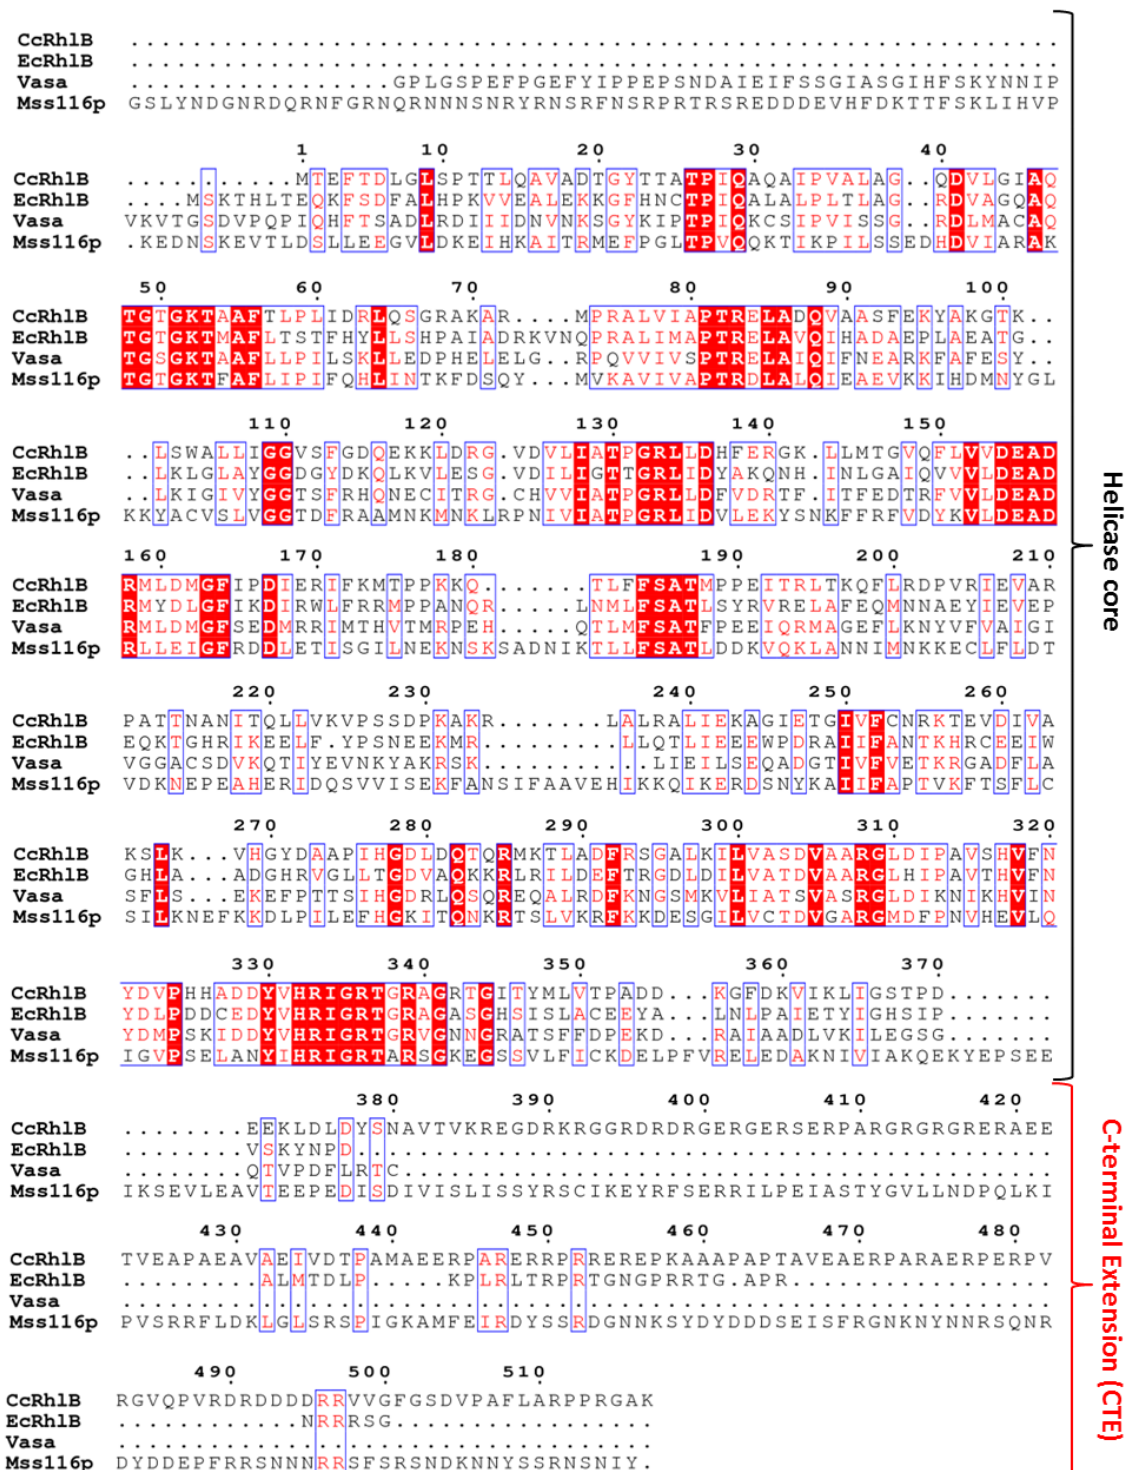

**Figure S11. Sequence alignment of CcNTD and EcNTD.** The entire RNase E catalytic domain sequence is shown. (CcNTD = 1-575, EcNTD = 1-527). The region involved in the interaction with RhlB (CcNTD<sub>1-274</sub>) is shown in the green boxed area.

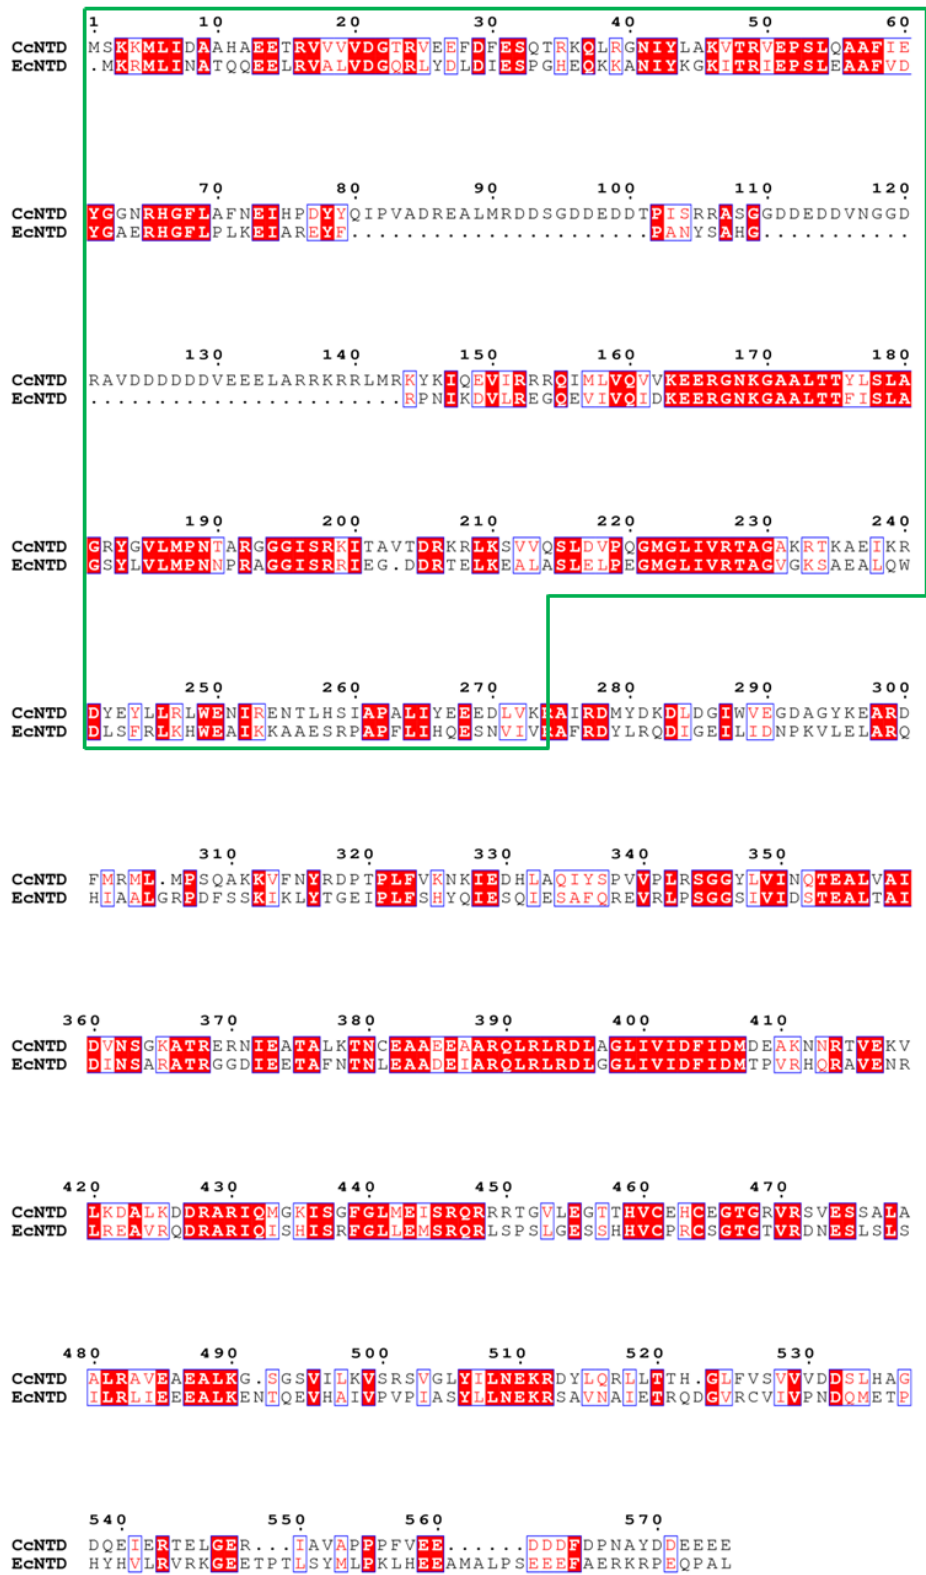

**Figure S12. Sequence alignment of *E. coli* and *C. crescentus* RNase D proteins.** Coli = *E. coli* RNase D, CCrnd1 = *C. crescentus* protein cc1704 (RNase D present in the RNA degradosome), CCrnd2 = *C. crescentus* protein cc3603 (truncated RNase D, not present in the RNA degradosome).

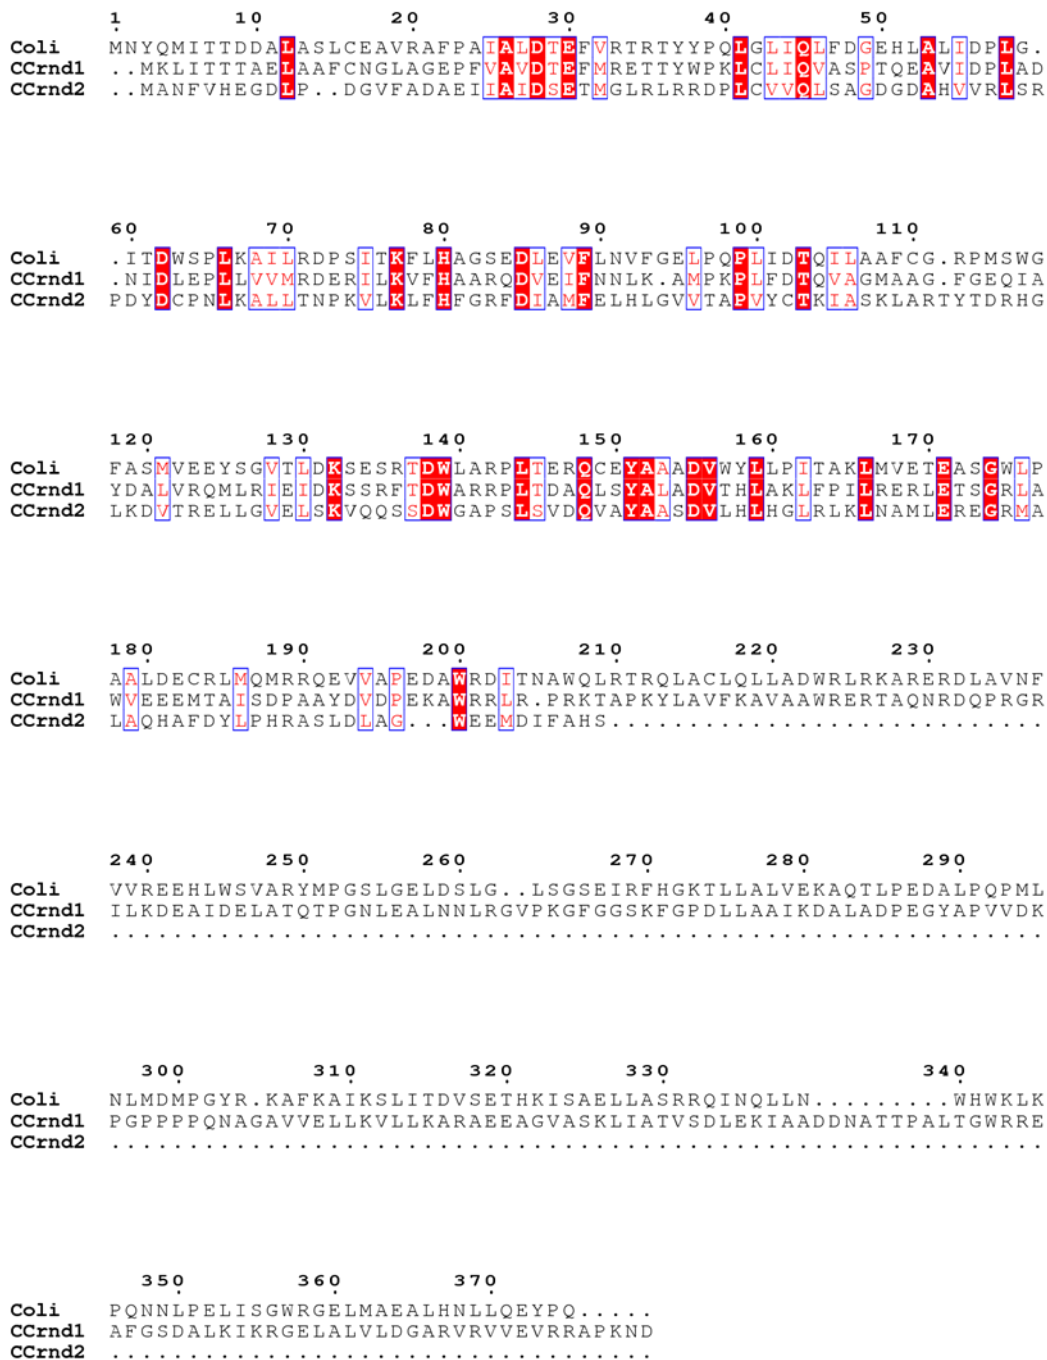

Supplement: supp_gku1134_nar-02500-r-2014-File008.pdf [file supp_gku1134_nar-02500-r-2014-File008.pdf]
